# Supplementary material for: Controlled synthesis of nanostructured manganese oxide: crystalline evolution and catalytic activities
Source: Royal Society of Chemistry journal article supplement (doi:10.1039/c3ce40603b), 2013-01-01

## Supplementary information

Figure S1 N<sub>2</sub> adsorption–desorption isotherms of manganese oxide

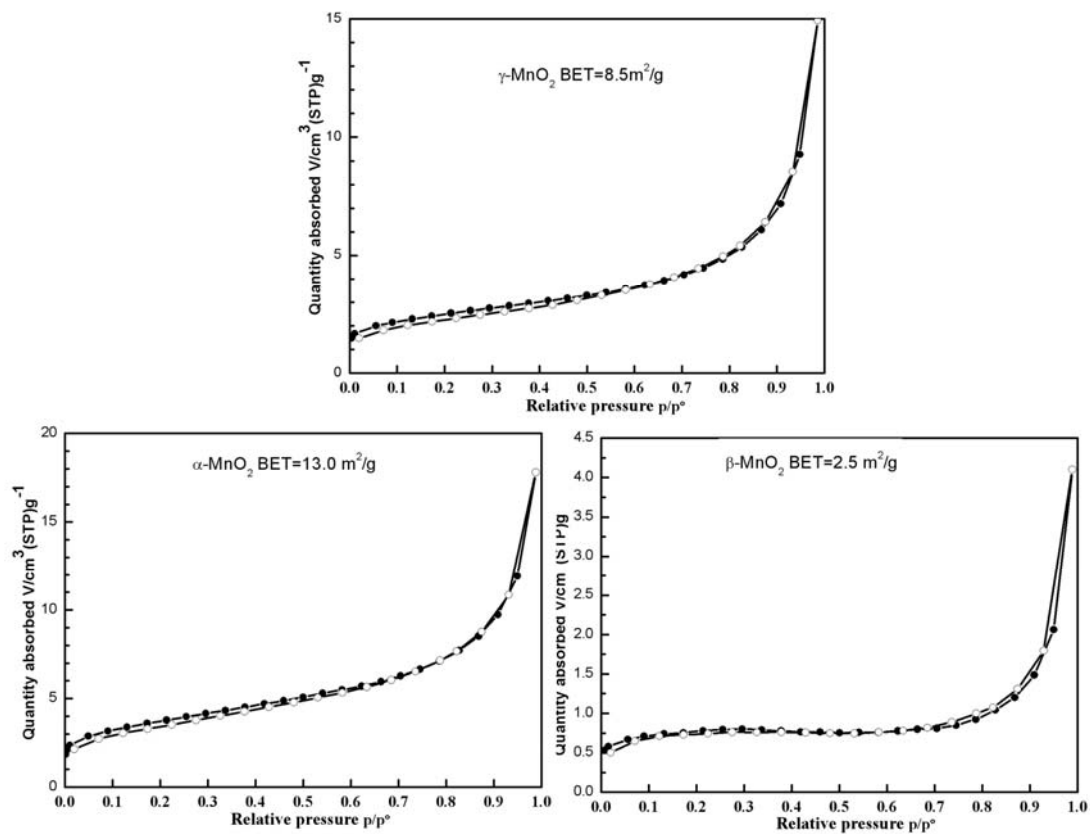

Figure S2 TEM and HRTEM images of  $\text{Mn}_3\text{O}_4$

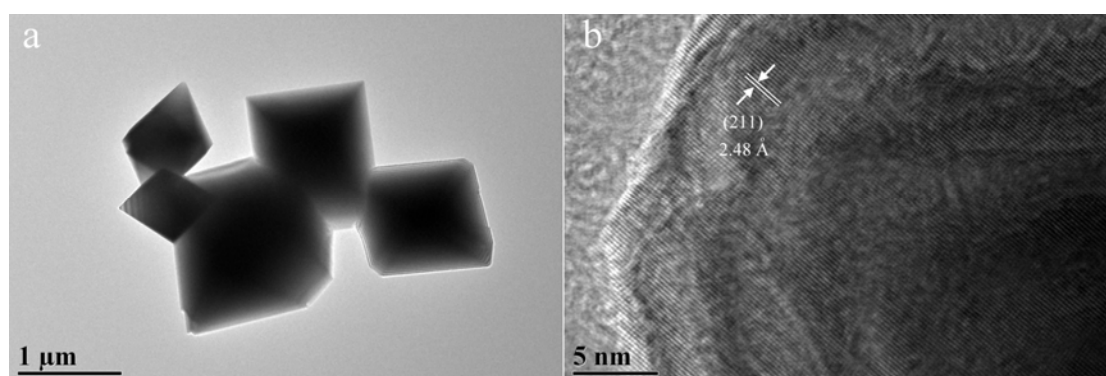

Figure S3 SEM image of MnOOH synthesized under a condition: 1 mmol MnSO<sub>4</sub> + 1.75 mmol KClO<sub>3</sub> + 0.1 mL AcOH; 15 mL distilled water; 12 h, 160 °C;

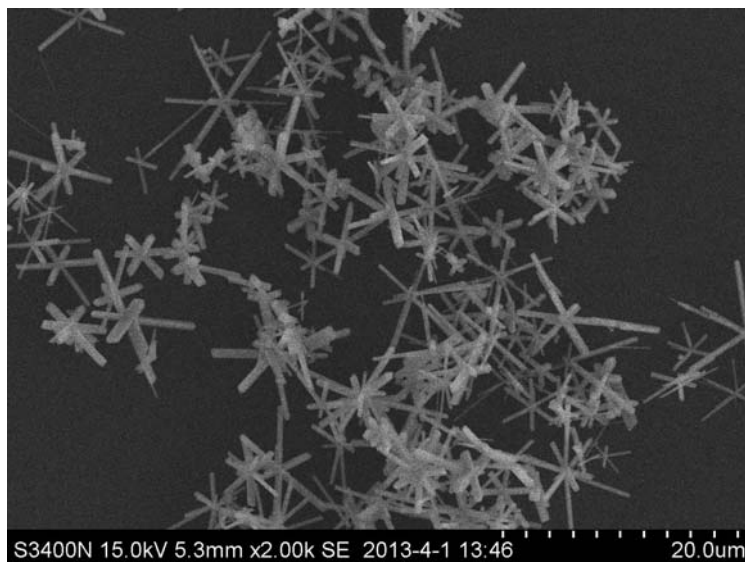

Figure S4 TG-DSC curves of MnOOH

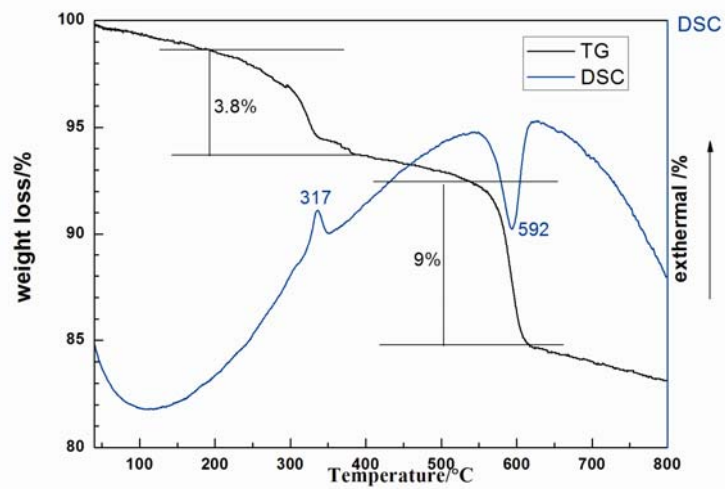

Supplement: c3ce40603b.pdf [file c3ce40603b.pdf]
